# Supplementary material
Source: HighWire-hosted journal article supplement (https://www.life-science-alliance.org/content/6/4/e202201615/F12)
Supplement: inline-supplementary-material-1 [file inline-supplementary-material-1.pdf]

# Raw data for Fig. 5F

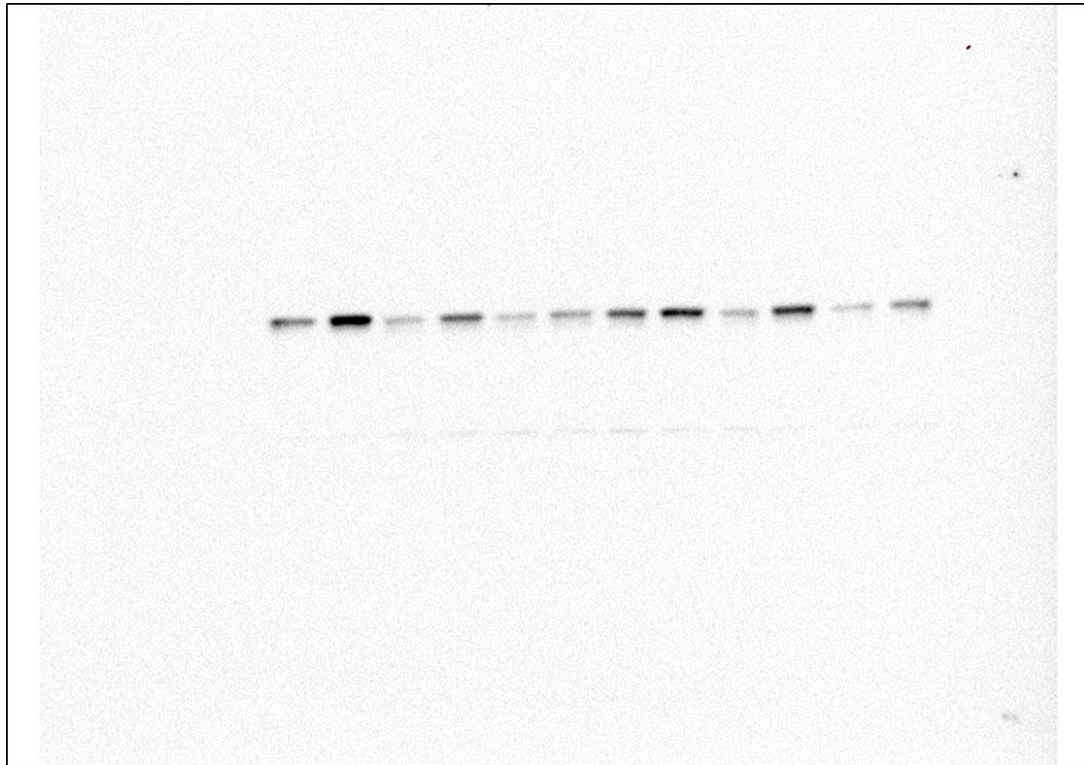

Cytoplasmic NFAT2  
Acquired on Bio-Rad ChemiDoc imaging system  
Exposure time : 27s

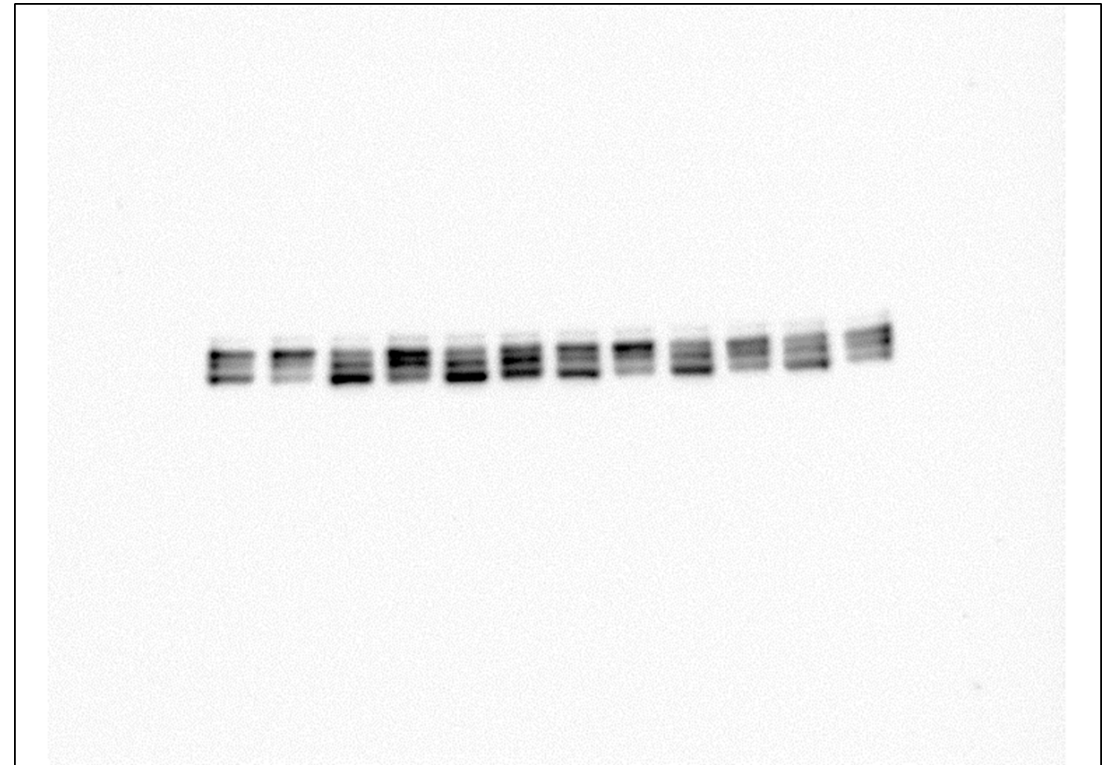

Nuclear NFAT2  
Acquired on Bio-Rad ChemiDoc imaging system  
Exposure time : 9s
